# Supplementary material for: Hypothalamic radial glia function as self-renewing neural progenitors in the absence of Wnt/ß-catenin signaling
Source: Oxford University Press journal article supplement (doi:10.1242/dev.126813), 2015-01-01
Supplement: dev126813supp.pdf [file dev126813supp.pdf]

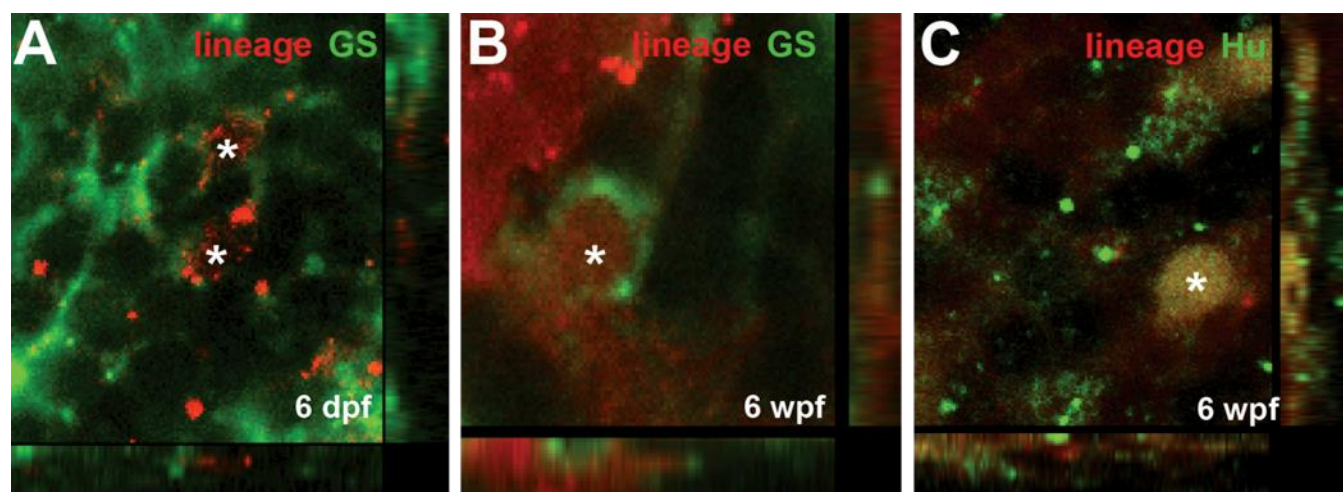

**Fig. S1. Images of double-labeled cells in lineage analysis.** (A) One day post-conversion, mCherry labels two GS+ cells (asterisks). (B,C) Five weeks post-conversion, mCherry labels a GS+ cell (B) and a HuC/D+ cell (C). Images are maximum-intensity Z projections through confocal stacks. XZ projections are shown in right panels, and YZ projections in lower panels.

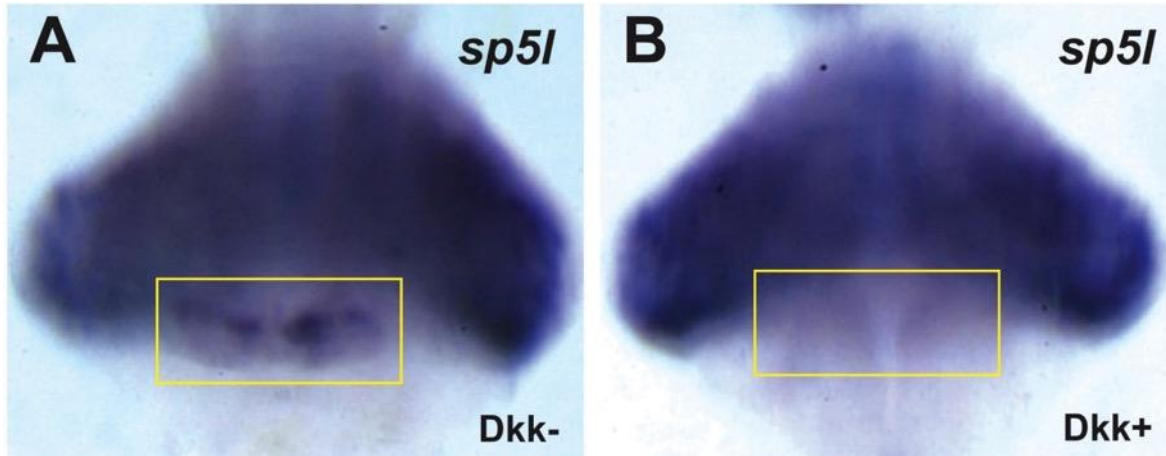

**Fig. S2. Hypothalamic expression of the Wnt target gene *sp5l* is eliminated by heat shock induction of Dkk1.** (A) 5 dpf wild-type brain 3 hours after heat shock shows expression of *sp5l* mRNA in the posterior recess (yellow rectangle). (B) *hs:dkk1-GFP* brain 3 hours after heat shock shows loss of *sp5l* mRNA expression in the posterior recess (yellow rectangle). Images are ventral whole-mount views of dissected brains after *in situ* hybridization.

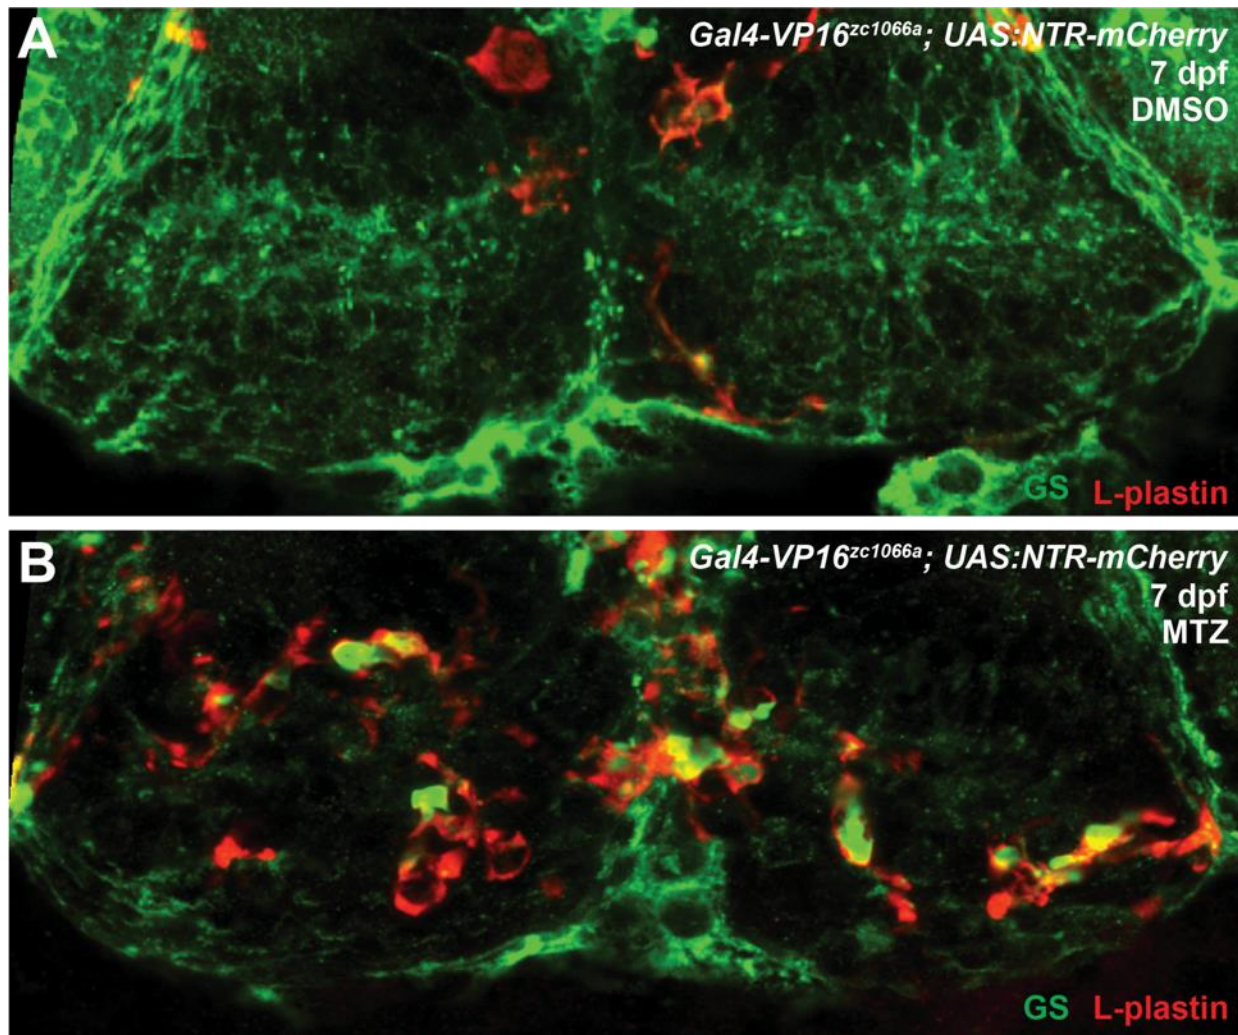

**Fig. S3. Metronidazole incubation leads to loss of Nitroreductase-expressing radial glia.** (A) Control animals incubated in DMSO show widespread GS expression (green) and few resident L-plastin<sup>+</sup> macrophages (red). (B) In contrast, partial ablation of NTR-expressing radial glia by incubation in 1mM MTZ from 5-6 dpf leads to widespread macrophage infiltration and engulfment of GS<sup>+</sup> cellular debris. Images are maximum intensity Z-projections through ventral whole-mount views of dissected brains.
